# Supplementary material for: A Survey-Based Analysis of Injuries to Horses Associated with Transport by Road in New Zealand
Source: MDPI journal article supplement (doi:10.3390/ani12030259), 2022-01-21
Supplement: s1 [file s1]

**Table S1:** Variables with a Wald test  $p$ -value  $\geq 0.25$  that were not eligible for initial inclusion in the multivariate logistic regression model based on the results of univariate logistic regression analyses of associations between horse injury in transit and industry sector, vehicle safety design features, and horse protective equipment used to protect horses in transit, and transport-related behavioural problems.

| Variable Name                                 | Category                    | Est. <sup>1</sup> | SE <sup>2</sup> | OR <sup>3</sup> | 95% CI <sup>4</sup> | $p$ <sup>5</sup> |
|-----------------------------------------------|-----------------------------|-------------------|-----------------|-----------------|---------------------|------------------|
| Vehicle type                                  | Float/trailer - angle load  | -0.13             | 0.37            | 0.99            | 0.47-2.06           | 0.834            |
|                                               | Float/trailer - straight    | -0.09             | 0.29            | 0.92            | 0.53-1.67           |                  |
|                                               | Commercial truck            | 0.19              | 0.42            | 1.20            | 0.52-2.72           |                  |
|                                               | Large truck - > 3 horses    | 0.16              | 0.32            | 1.18            | 0.63-2.26           |                  |
|                                               | Small truck - 2 to 3 horses | Ref               |                 |                 |                     |                  |
| Sedation used for transport                   | Yes                         | 0.14              | 0.20            | 1.15            | 0.77-1.69           | 0.489            |
|                                               | No                          | Ref               |                 |                 |                     |                  |
| Horse specifically trained for transport      | Yes                         | -0.10             | 0.21            | 0.91            | 0.60-1.40           | 0.647            |
|                                               | No                          | Ref               |                 |                 |                     |                  |
| Neck rug used                                 | Yes                         | -0.30             | 0.36            | 0.74            | 0.38-1.59           | 0.422            |
|                                               | No                          | Ref               |                 |                 |                     |                  |
| Body rug used                                 | Yes                         | 0.12              | 0.20            | 1.13            | 0.77-1.68           | 0.530            |
|                                               | No                          | Ref               |                 |                 |                     |                  |
| Leg bandage/boots used                        | Yes                         | 0.18              | 0.18            | 1.20            | 0.84-1.72           | 0.319            |
|                                               | No                          | Ref               |                 |                 |                     |                  |
| Head restraint in the moving vehicle          | Crosstied                   | 0.69              | 0.49            | 2.00            | 0.74-5.13           | 0.574            |
|                                               | Elastic Bungee cord         | -0.12             | 0.45            | 0.88            | 0.35-2.09           |                  |
|                                               | Tied on a long rope         | -0.19             | 0.34            | 0.83            | 0.43-1.64           |                  |
|                                               | Tied on a short rope        | -0.09             | 0.29            | 0.92            | 0.53-1.67           |                  |
|                                               | Not restrained              | Ref               |                 |                 |                     |                  |
| Padded walls in the vehicle                   | Yes                         | -0.01             | 0.18            | 0.99            | 0.70-1.40           | 0.956            |
|                                               | No                          | Ref               |                 |                 |                     |                  |
| Padded chest bar in the vehicle               | Yes                         | -0.12             | 0.18            | 0.89            | 0.62-1.26           | 0.509            |
|                                               | No                          | Ref               |                 |                 |                     |                  |
| Padded bum (rear) bar in the vehicle          | Yes                         | -0.02             | 0.18            | 0.98            | 0.68-1.40           | 0.925            |
|                                               | No                          | Ref               |                 |                 |                     |                  |
| Padded partition in the vehicle               | Yes                         | 0.12              | 0.18            | 1.12            | 0.79-1.60           | 0.513            |
|                                               | No                          | Ref               |                 |                 |                     |                  |
| Partition between horses extends to the floor | Yes                         | 0.17              | 0.29            | 1.12            | 0.65-2.04           | 0.555            |
|                                               | No                          | Ref               |                 |                 |                     |                  |

<sup>1</sup>Coefficient estimate; <sup>2</sup>Standard error; <sup>3</sup>Odds ratio; <sup>4</sup>95% Confidence interval; <sup>5</sup>Wald test  $p$ -value.
